# Supplementary material for: Comparative analysis of mitochondrial genomes of geographic variants of the gypsy moth, Lymantria dispar, reveals a previously undescribed genotypic entity
Source: PubMed Central journal article supplement (PMC5660218; doi:10.1038/s41598-017-14530-6), 2017-10-27
Supplement: 41598_2017_14530_MOESM1_ESM.pdf [file 41598_2017_14530_MOESM1_ESM.pdf]

**Supplementary material for the manuscript:**

**Comparative analysis of mitochondrial genomes of geographic variants of the gypsy moth,  
*Lymantria dispar*, reveals a previously undescribed genotypic entity**

by

Abdelmadjid Djoumad, Audrey Nisole, Reza Zahiri, Luca Freschi, Sandrine Picq,  
Dawn E. Gundersen-Rindal, Michael E. Sparks, Ken Dewar, Don Stewart, Halim Maaroufi,  
Roger C. Levesque, Richard C. Hamelin, & Michel Cusson

*Scientific Reports*

**Table S1.** List of primers used to amplify and sequence the mitochondrial genomes.

| Name             | Sequence                               | Position on Ldd_NJ | Length | Direction | Fragment |
|------------------|----------------------------------------|--------------------|--------|-----------|----------|
| P1577_16S-F      | GGTATTTTAAAGGAATTCGGC                  | 633                | 21     | F         | 2        |
| Alb_16SrRNA      | TGATTATGCTACCTTTGTACAGTCA              | 753                | 25     | R         | 2        |
| P1525inv         | CTGCCAAAATAGTAAATCCAT                  | 1,359              | 21     | R         | 2        |
| P1525_ND1        | ATGGATTACTATTTTGGCAG                   | 1,359              | 21     | F         | 2        |
| P1519inv         | CTCCTGTATTAGCTTTTGCT                   | 1,677              | 20     | F         | 2        |
| P1519_ND1        | AGCAAAAGCTAATACAGGAG                   | 1,677              | 20     | R         | 2        |
| P1554_Post_ND1   | TACTCTACCTCGTTATCGTTAT                 | 2,260              | 22     | F         | 2        |
| P1524_Cytb       | TGATCCAGTTTGATGAAGAA                   | 2,999              | 20     | F         | 2        |
| P1533inv         | CATATTGGACGAGGAATTTATTATGAATC          | 3,297              | 29     | R         | 2        |
| P1533_ND6*       | GATTCATAATAAATTCCTCGTCCAATATG          | 3,297              | 29     | F         | 2,1      |
| P1553_Post_Cytb  | GGTTTGATTTTCGTATAAGAATGAAT             | 3,589              | 26     | F         | 2,1      |
| P1552_Post_Cytb  | ATTCATTCTTATACGAAAATCAAACC             | 3,589              | 26     | R         | 2,1      |
| P1556_Alb_Cytb   | ATATTGGTAATTTGACTACTGC                 | 3,735              | 23     | F         | 2,1      |
| P1532_ND6*       | GGTCTTTTAGTTTTATTTATTTATGTTTCAAGAATTGC | 4,023              | 38     | R         | 2,1      |
| P1532inv         | GCAATTCCTGAAACATAAAATAAACTAAAAGACC     | 4,023              | 38     | F         | 1        |
| P1522inv         | AATCCTATAGAAAGGGGGTT                   | 4,158              | 20     | F         | 1        |
| P1522_ND6        | AACCCCTTTCTATAGGATT                    | 4,158              | 20     | R         | 1        |
| P1545_ND4        | AATTAAGTAGGAATTAAC                     | 5,052              | 20     | R         | 1        |
| P1544_ND4        | CATCTAATATGGCTGCYCCTC                  | 5,751              | 21     | F         | 1        |
| P1528inv         | TACCTGAATAACTTTCTCCATG                 | 5,906              | 22     | R         | 1        |
| P1528_ND4        | CATGGAGAAAGTTATTCAGGTA                 | 5,906              | 22     | F         | 1        |
| P1527_ND5        | TTCTTCAGTGGTTATTTAT                    | 6,314              | 19     | F         | 1        |
| P1521_ND5        | AACATCCCGGCATTATATGA                   | 6,513              | 20     | R         | 1        |
| P1530_ND5        | CACCTACTCCAGTTTCTGCT                   | 6,742              | 20     | F         | 1        |
| P1535_ND5        | CACCTGCTGTAATAAGTAGAAG                 | 6,772              | 24     | R         | 1        |
| P1536_ND5        | CAAATATAGCTTTATGTGGRATTCC              | 7,150              | 25     | F         | 1        |
| P1529_ND5        | CCTCACTTCATCTATATCAAT                  | 7,680              | 22     | R         | 1        |
| P1531inv         | TCGAGCTGAAGATTTTGGATCA                 | 8,547              | 22     | F         | 1        |
| P1531_ND3        | TGATCCAAAATCTTCAGCTCGA                 | 8,547              | 22     | R         | 1        |
| Ldja_COIII-R     | TGAAGCCGCAGCATGATATTG                  | 8,825              | 21     | F         | 1        |
| Ldja_COIII-F     | CAATATCATGCTGCGGCTCA                   | 8,825              | 21     | R         | 1        |
| KazUmbI_COIII-R  | ATTTGAAATGGRTTAAAGGGGATA               | 9,164              | 24     | R         | 1        |
| KazUmbI_COIII-F  | TATCCCCTTTAAYCCATTTCAAAT               | 9,164              | 24     | F         | 1        |
| P1523inv         | CAGTTGCGGTTATCCAATCA                   | 9,612              | 20     | R         | 1        |
| P1523_ATP6       | TGATTGGATAACCGCAACTG                   | 9,612              | 20     | F         | 1        |
| P1557_Alb_ATP6   | GAACCTCTCTGCTTTAATA                    | 9,822              | 20     | R         | 1        |
| R-COII           | TGACTGAAAGTAAGTAATGGTCTC               | 10,526             | 27     | F         | 1        |
| P1559_Xyl_COII-F | GAGACCATTACTTGCTTTTCAGTCATCT           | 10,526             | 24     | R         | 1        |
| 2Alb_COII-R      | AGACCATTACTTACTTTTCAGCCA               | 10,527             | 23     | F         | 1        |

|                 |                            |        |    |   |   |
|-----------------|----------------------------|--------|----|---|---|
| P1518_COII      | GCGGAACTAACCACAGATTT       | 10,621 | 20 | R | 1 |
| Alb_COII        | TGATGCTAACCAGGACGAT        | 10,704 | 20 | R | 1 |
| P1547_Post_COII | TGATGCCAACCCAGGACGAT       | 10,704 | 20 | R | 1 |
| P1558_Alb_COI   | TAGGTGTTAAAATTGATGCTAAC    | 10,714 | 23 | R | 1 |
| P1562_Alb_COII  | CCTCTCTCCGACTTCTATAT       | 10,984 | 20 | R | 1 |
| P1549_Post_COII | TGTTCTATTAGAGGTGATGCTC     | 11,183 | 22 | F | 1 |
| P1550_Post_COII | AGGTGATGCTCTATTTTGGAGAT    | 11,194 | 23 | F | 1 |
| P1365*          | CCTGTTTTAGCAGGTGCTATTAC    | 12,226 | 23 | R | 1 |
| P1364 *         | GATCATTTCCGATTAATGATCCAGG  | 12,692 | 25 | F | 2 |
| Alb_COI         | TACCGCTTAAACTCAGCCAT       | 12,853 | 20 | R | 2 |
| Xyl_COI         | TACAATTTATCGCTTAAACTCAGCCA | 12,854 | 26 | R | 2 |
| P1526_ND2       | ATTGCAAATTTTAAGGAGTATTT    | 12,943 | 23 | F | 2 |
| P1379_ND2       | AATCCAATAAATGGGGTAATCCTCCT | 13,291 | 27 | F | 2 |
| P1378inv        | ATCCTTCAACAATATTGGGGAATCAA | 13,694 | 26 | F | 2 |
| P1378_ND2       | TTGATCCCCAATATTGTTGAAGGAT  | 13,694 | 26 | R | 2 |
| ND2-F           | TGGATGTTGAATTGGGTTAGA      | 13,945 | 21 | F | 2 |
| P1520_ND2       | TGGATGTTGAATTGGRTTAGA      | 13,945 | 21 | R | 2 |
| P1536inv_ND2    | CAAATATAGCTTTATGTGGRATTCC  | 13,945 | 21 | R | 2 |
| Xyl_16SrRNA     | AGAATAATCCTTTAATCAGGCACT   | 14,213 | 24 | F | 2 |
| Alb_ND2tRNA     | GATTCCTTTATAGTTGGGGTATG    | 14,254 | 24 | F | 2 |
| P1576_16S-R     | ATATGAAAGCGACGGGCAATATGTAC | 15,505 | 26 | R | 2 |

\*Primers used to amplify the two main (initial) mitochondrial fragments

**Table S2.** Pair-wise percent identity among the 11 mitochondrial genomes sequenced. Values provided for the entire genome (bottom half, black letters) and for the protein coding genes (PCGs) only (upper half, red letters).

|                            |               | <b>PCGs</b>         |        |        |        |        |                       |        |                       |        |       |       |
|----------------------------|---------------|---------------------|--------|--------|--------|--------|-----------------------|--------|-----------------------|--------|-------|-------|
|                            |               | <i>L. d. dispar</i> |        |        |        |        | <i>L. d. asiatica</i> |        | <i>L. d. japonica</i> |        |       |       |
|                            |               | Ldd_NJ              | Ldd_KG | Ldd_LJ | Ldd_KZ | Ldd_RB | Lda_TJ                | Lda_RM | Ldj_JN                | Ldj_ID | L?_IR | Lu_JH |
| <b>Complete mitogenome</b> | <b>Ldd_NJ</b> | -                   | 99.7   | 99.8   | 99.7   | 99.8   | 99.2                  | 99.2   | 99.3                  | 99.3   | 98.9  | 97.9  |
|                            | <b>Ldd_KG</b> | 99.0                | -      | 99.6   | 99.6   | 99.6   | 99.2                  | 99.2   | 99.3                  | 99.3   | 98.9  | 97.8  |
|                            | <b>Ldd_LJ</b> | 99.4                | 99.3   | -      | 99.6   | 99.8   | 99.1                  | 99.1   | 99.2                  | 99.2   | 98.8  | 97.9  |
|                            | <b>Ldd_KZ</b> | 99.4                | 99.3   | 99.4   | -      | 99.6   | 99.2                  | 99.2   | 99.2                  | 99.2   | 98.8  | 97.9  |
|                            | <b>Ldd_RB</b> | 99.0                | 98.6   | 99.0   | 99.1   | -      | 99.2                  | 99.2   | 99.3                  | 99.3   | 98.9  | 97.9  |
|                            | <b>Lda_TJ</b> | 98.6                | 98.4   | 98.4   | 98.7   | 98.9   | -                     | 99.8   | 99.9                  | 99.9   | 98.8  | 97.6  |
|                            | <b>Lda_RM</b> | 98.6                | 98.3   | 98.4   | 98.7   | 98.9   | 99.6                  | -      | 99.8                  | 99.8   | 98.8  | 97.6  |
|                            | <b>Ldj_JN</b> | 98.7                | 98.4   | 98.5   | 98.8   | 98.9   | 99.6                  | 99.5   | -                     | 99.8   | 98.8  | 97.6  |
|                            | <b>Ldj_ID</b> | 98.8                | 98.5   | 98.6   | 98.9   | 98.9   | 99.6                  | 99.5   | 99.6                  | -      | 98.8  | 97.6  |
|                            | <b>L?_IR</b>  | 98.4                | 98.3   | 98.5   | 98.6   | 98.4   | 98.4                  | 98.3   | 98.5                  | 98.5   | -     | 97.9  |
|                            | <b>Lu_JH</b>  | 97.7                | 97.7   | 97.9   | 97.8   | 97.5   | 97.3                  | 97.3   | 97.4                  | 97.4   | 97.7  | -     |

**Table S3.** Assessment of whether each of the 13 mitochondrial protein-coding genes are under purifying or positive selection. At a significance level of 0.05, all but two genes were observed to be under purifying selection (blue highlighting), and none under positive selection.

| Gene        | Purifying<br>(p-value) | Positive<br>(p-value) |
|-------------|------------------------|-----------------------|
| <i>COI</i>  | <0.001                 | 1                     |
| <i>COII</i> | 0.017                  | 1                     |
| <i>COII</i> | <0.001                 | 1                     |
| <i>ATP6</i> | 0.001                  | 1                     |
| <i>ATP8</i> | 0.016                  | 1                     |
| <i>Cytb</i> | <0.001                 | 1                     |
| <i>ND1</i>  | <0.001                 | 1                     |
| <i>ND2</i>  | <0.001                 | 1                     |
| <i>ND3</i>  | 0.065                  | 1                     |
| <i>ND4</i>  | <0.001                 | 1                     |
| <i>ND4L</i> | 0.302                  | 1                     |
| <i>ND5</i>  | <0.001                 | 1                     |
| <i>ND6</i>  | 0.006                  | 1                     |

Figure S1

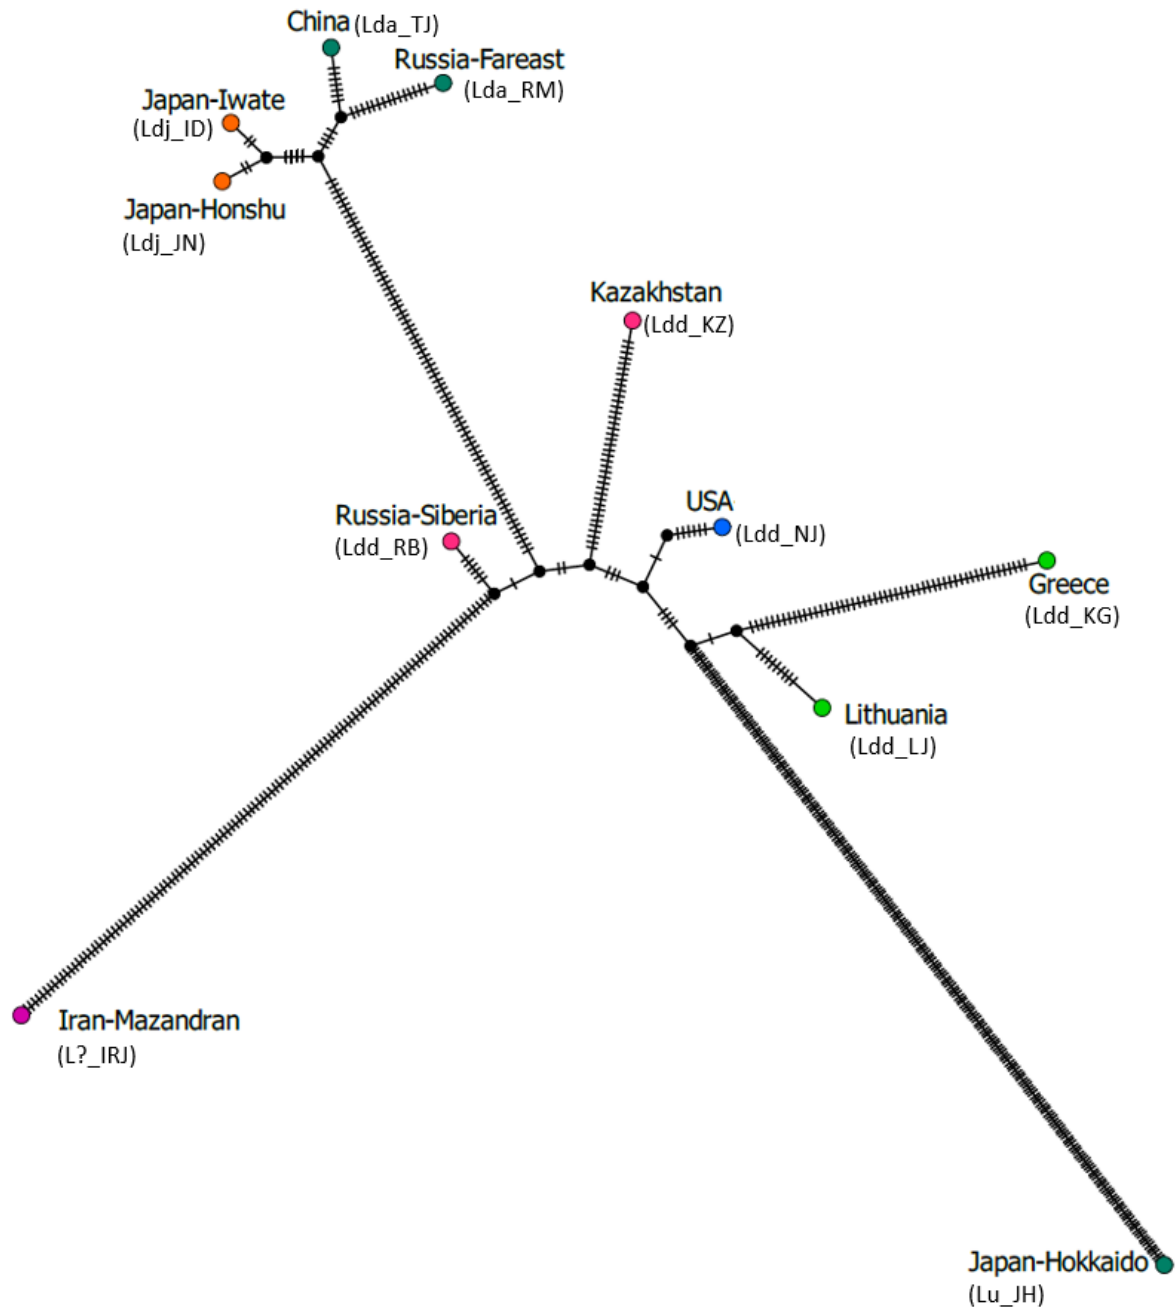

**Figure S1.** Haplotype network construction for the 11 mitochondrial genomes examined in the present study, carried out using POPART<sup>35</sup>. Each hatch mark represents one substitution.

Figure S2

A

|                |                                                                  |
|----------------|------------------------------------------------------------------|
| Lep0813_Iran   | gcatgagctgtaacaatagtagtattataaaatttgatcatttccgattaatgatccaggattt |
| Lep0816_Iran   | gcatgagctgtaacaatagtagtattataaaatttgatcatttccgattaatgatccaggattt |
| Lep0941_Russia | gcatgagctgtaacaatagtagtattataaaatttgatcatttccgattaatgatccaggattt |
| Lep0944_Russia | gcatgagctgtaacaatagtagtattataaaatttgatcatttccgattaatgatccaggattt |
| Lep0963_Russia | gcatgagctgtaacaatagtagtattataaaatttgatcatttccgattaatgatccaggattt |
|                | *****                                                            |
| Lep0813_Iran   | cctaattcagctcgaattagtagtaaaacttagagatggtccactatttctgatcaaatacca  |
| Lep0816_Iran   | cctaattcagctcgaattagtagtaaaacttagagatggtccactatttctgatcaaatacca  |
| Lep0941_Russia | cctaattcagctcgaattagtagtaaaacttagagatggtccactatttctgatcaaatacca  |
| Lep0944_Russia | cctaattcagctcgaattagtagtaaaacttagagatggtccactatttctgatcaaatacca  |
| Lep0963_Russia | cctaattcagctcgaattagtagtaaaacttagagatggtccactatttctgatcaaatacca  |
|                | *****                                                            |
| Lep0813_Iran   | aaaataaaatataagggtccaatatccttatgatttggtgaatataatcattttcgctta     |
| Lep0816_Iran   | aaaataaaatataagggtccaatatccttatgatttggtgaatataatcattttcgctta     |
| Lep0941_Russia | aaaataaaatataagggtccaatatccttatgatttggtgaatataatcattttcgctta     |
| Lep0944_Russia | aaaataaaatataagggtccaatatccttatgatttggtgaatataatcattttcgctta     |
| Lep0963_Russia | aaaataaaatataagggtccaatatccttatgatttggtgaatataatcattttcgctta     |
|                | *****                                                            |
| Lep0813_Iran   | ttttttaataaaaatggctgagtttaagcggtaaaattgtaaatttattaacgagaaatctc   |
| Lep0816_Iran   | tttttttaataaaaatggctgagtttaagcggtaaaattgtaaatttattaacgagaaatctc  |
| Lep0941_Russia | tttttttaataaaaatggctgagtttaagcggtaaaattgtaaatttattaacgagaaatctc  |
| Lep0944_Russia | tttttttaataaaaatggctgagtttaagcggtaaaattgtaaatttattaacgagaaatctc  |
| Lep0963_Russia | tttttttaataaaaatggctgagtttaagcggtaaaattgtaaatttattaacgagaaatctc  |
|                | *****                                                            |
| Lep0813_Iran   | tctttttattatattaagggtcttatattcaataatgatgtaaaattgcaaattttaaggag   |
| Lep0816_Iran   | tctttttattatattaagggtcttatattcaataatgatgtaaaattgcaaattttaaggag   |
| Lep0941_Russia | tctttttattatattaagggtcttatattcaataatgatgtaaaattgcaaattttaaggag   |
| Lep0944_Russia | tctttttattatattaagggtcttatattcaataatgatgtaaaattgcaaattttaaggag   |
| Lep0963_Russia | tctttttattatattaagggtcttatattcaataatgatgtaaaattgcaaattttaaggag   |
|                | *****                                                            |
| Lep0813_Iran   | tattttaaattataactaaggcttaaaagactatttctttataaataaattttgaagattatta |
| Lep0816_Iran   | tattttaaattataactaaggcttaaaagactatttctttataaataaattttgaagattatta |
| Lep0941_Russia | tattttaaattataactaaggcttaaaagactatttctttataaataaattttgaagattatta |
| Lep0944_Russia | tattttaaattataactaaggcttaaaagactatttctttataaataaattttgaagattatta |
| Lep0963_Russia | tattttaaattataactaaggcttaaaagactatttctttataaataaattttgaagattatta |
|                | *****                                                            |
| Lep0813_Iran   | gtttaccttaacttaaaaccttaataaaaaaaaaagggttctaataattataactaaaaata   |
| Lep0816_Iran   | gtttaccttaacttaaaaccttaataaaaaaaaaagggttctaataattataactaaaaata   |
| Lep0941_Russia | gtttaccttaacttaaaaccttaataaaaaaaaaagggttctaataattataactaaaaata   |
| Lep0944_Russia | gtttaccttaacttaaaaccttaataaaaaaaaaagggttctaataattataactaaaaata   |
| Lep0963_Russia | gtttaccttaacttaaaaccttaataaaaaaaaaagggttctaataattataactaaaaata   |
|                | *****                                                            |

Lep0813\_Iran g  
Lep0816\_Iran g  
Lep0941\_Russia  
Lep0944\_Russia  
Lep0963\_Russia

Lep0813\_Iran a  
Lep0816\_Iran a  
Lep0941\_Russia  
Lep0944\_Russia  
Lep0963\_Russia

Lep0813\_Iran  
Lep0816\_Iran  
Lep0941\_Russia  
Lep0944\_Russia  
Lep0963\_Russia

Lep0813\_Iran  
Lep0816\_Iran  
Lep0941\_Russia  
Lep0944\_Russia  
Lep0963\_Russia

Lep0813\_Iran a  
Lep0816\_Iran a  
Lep0941\_Russia  
Lep0944\_Russia  
Lep0963\_Russia

Lep0813\_Iran  
Lep0816\_Iran  
Lep0941\_Russia  
Lep0944\_Russia  
Lep0963\_Russia

Lep0813\_Iran  
Lep0816\_Iran  
Lep0941\_Russia  
Lep0944\_Russia  
Lep0963\_Russia

Lep0813\_Iran  
Lep0816\_Iran  
Lep0941\_Russia  
Lep0944\_Russia  
Lep0963\_Russia



**Lep0813\_Iran** cctcctaaagctccaatgattacattttattgagataattaaaataataaaaattttttattt  
**Lep0816\_Iran** cctcctaaagctccaatgattacattttattgagataattaaaataataaaaattttttattt  
**Lep0941\_Russia** cctcctaaagctccaatgattacattttattgagataattaaaataataaaaattttttattt  
**Lep0944\_Russia** cctcctaaagctccaatgattacattttattgagataattaaaataataaaaattttttattt  
**Lep0963\_Russia** cctcctaaagctccaatgattacattttattgagataattaaaataataaaaattttttattt  
 \*\*\*\*\*

**B**

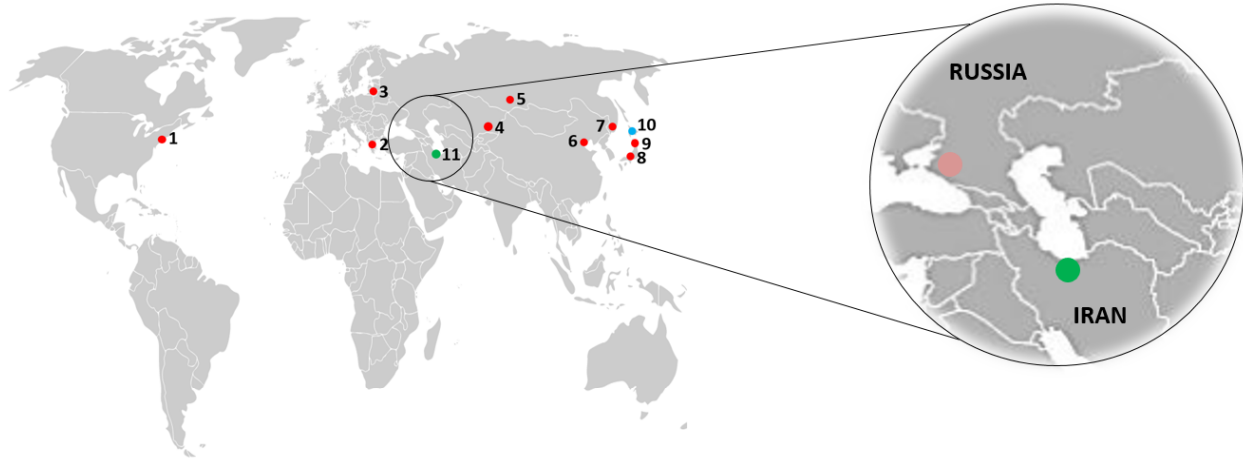

| Name    | Origin | Region           | Supplier      |
|---------|--------|------------------|---------------|
| Lep0813 | Iran   | Noor, Mazandaran | H. Rajaei     |
| Lep0816 | Iran   | Noor, Mazandaran | H. Rajaei     |
| Lep0941 | Russia | Krasnodar Reg.   | R.V. Yakovlev |
| Lep0944 | Russia | Krasnodar Reg.   | R.V. Yakovlev |
| Lep0963 | Russia | Krasnodar Reg.   | R.V. Yakovlev |

**Figure S2.** A) Nucleotide alignment (MAFFT) of the mitochondrial *COI-ND2* region for five specimens from the Caucasus (Caspian Sea region), including L?\_IR. The alignment shows that all five specimens appear to share the same mitochondrial haplotype. In red, sequence from Lep0816-Iran, corresponding to L?\_IR. In blue, SNPs unique to the Caucasian specimens, relative to the other *Lymantria dispar* haplotypes (in grey). B) Map showing the sampling locations of the specimens. Background map is a cropped version of the one available at: [https://commons.wikimedia.org/wiki/Maps\\_of\\_the\\_world#/media/File:BlankMap-World-v2.png](https://commons.wikimedia.org/wiki/Maps_of_the_world#/media/File:BlankMap-World-v2.png) (for information about license, follow the same link).
